# Supplementary material
Source: PubMed Central journal article supplement (PMC2799357)
Supplement: pp.109.145292_1.pdf [file pp.109.145292_1.pdf]

Supplemental Figure S1 - see video

|                         | Generation 1 |            | Generation 2 |            |
|-------------------------|--------------|------------|--------------|------------|
|                         | Sm           | Lg         | Sm           | Lg         |
| <sup>34</sup> S         | 19900±2300*  | 14900±1000 | 14900±1200   | 14800±2900 |
| <b><sup>39</sup>K</b>   | 11200±1000** | 8660±620   | 16400±1400** | 8820±1400  |
| <sup>43</sup> Ca        | 10500±950**  | 6710±530   | 8030±260     | 8100±1300  |
| <sup>31</sup> P         | 8360±830     | 7740±590   | 8530±750     | 7480±1400  |
| <b><sup>25</sup>Mg</b>  | 4270±414*    | 3530±250   | 4100±290*    | 3290±530   |
| <b><sup>23</sup>Na</b>  | 311±45**     | 58±5       | 197±50*      | 58±6       |
| <sup>66</sup> Zn        | 82±8**       | 63±5       | 83±7         | 71±13      |
| <sup>55</sup> Mn        | 53±4**       | 34±3       | 52±5         | 47±9       |
| <sup>57</sup> Fe        | 26±4         | 23±2       | 61±7         | 56±9       |
| <sup>65</sup> Cu        | 14±1**       | 9.9±0.6    | 13±0.6       | 11±3       |
| <sup>11</sup> B         | 10±2*        | 5.9±0.5    | 13±10        | 6.6±2      |
| <b><sup>85</sup>Rb</b>  | 4.7±0.4*     | 3.8±0.3    | 13±0.9**     | 7.3±1.4    |
| <sup>7</sup> Li         | 2.6±0.2**    | 0.90±0.2   | 9.2±0.9      | 10±0.8     |
| <b><sup>114</sup>Cd</b> | 1.9±0.2**    | 0.61±0.1   | 0.38±0**     | 0.21±0     |
| <b><sup>60</sup>Ni</b>  | 1.8±0.2**    | 0.96±0.04  | 3.0±0.3**    | 1.4±0.3    |
| <b><sup>98</sup>Mo</b>  | 1.5±0.2**    | 1.0±0.1    | 2.4±0.1**    | 1.5±0.2    |
| <sup>82</sup> Se        | 0.15±0.1     | 0.02±0.1   | 0±0.1        | 0±0.1      |
| <sup>59</sup> Co        | 0.095±0.01** | 0.049±0.01 | 0.27±0.02    | 0.22±0.05  |
| <sup>75</sup> As        | 0.064±0*     | 0.042±0    | 0.052±0      | 0.037±0    |

**Supporting Table 1:** Elemental content (pg) per µg tissue for two generations of wild-type seed sieved into two classes: small (212-250 µm) and large (300-355 µm). Elements that were significantly different between large and small seeds from both generations are in bold. \*\* p<0.01, \* p<0.05. All elements that were significantly different were present in greater amounts in the small seeds.

|                        | Generation 1                                  |                                           | Generation 2                                 |                                           |
|------------------------|-----------------------------------------------|-------------------------------------------|----------------------------------------------|-------------------------------------------|
|                        | Sm                                            | Lg                                        | Sm                                           | Lg                                        |
| <b><sup>34</sup>S</b>  | 2.99x10 <sup>5</sup> ±3.4x10 <sup>4</sup> **  | 4.48x10 <sup>5</sup> ±3.0x10 <sup>4</sup> | 2.23x10 <sup>5</sup> ±1.8x10 <sup>4</sup> *  | 4.45x10 <sup>5</sup> ±8.6x10 <sup>4</sup> |
| <sup>39</sup> K        | 1.68x10 <sup>5</sup> ±1.6x10 <sup>4</sup> **  | 2.60x10 <sup>5</sup> ±1.9x10 <sup>4</sup> | 2.47x10 <sup>5</sup> ±2.1x10 <sup>4</sup>    | 2.65x10 <sup>5</sup> ±4.2x10 <sup>4</sup> |
| <b><sup>43</sup>Ca</b> | 1.58x10 <sup>5</sup> ±1.4x10 <sup>4</sup> **  | 2.01x10 <sup>5</sup> ±1.6x10 <sup>4</sup> | 1.20x10 <sup>5</sup> ±3.9x10 <sup>3</sup> ** | 2.43x10 <sup>5</sup> ±3.9x10 <sup>4</sup> |
| <b><sup>31</sup>P</b>  | 1.25x10 <sup>5</sup> ±1.25x10 <sup>4</sup> ** | 2.32x10 <sup>5</sup> ±1.8x10 <sup>4</sup> | 1.28x10 <sup>5</sup> ±1.1x10 <sup>4</sup> *  | 2.24x10 <sup>5</sup> ±4.1x10 <sup>4</sup> |
| <b><sup>25</sup>Mg</b> | 6.41x10 <sup>4</sup> ±6.2x10 <sup>3</sup> **  | 1.06x10 <sup>5</sup> ±7.4x10 <sup>3</sup> | 6.15x10 <sup>4</sup> ±4.4x10 <sup>3</sup> *  | 9.86x10 <sup>4</sup> ±1.6x10 <sup>4</sup> |
| <b><sup>23</sup>Na</b> | 4660±680**                                    | 1740±140                                  | 2950±750*                                    | 1750±180                                  |
| <b><sup>66</sup>Zn</b> | 1230±120**                                    | 1890±160                                  | 1240±110*                                    | 2120±390                                  |
| <b><sup>55</sup>Mn</b> | 790±59**                                      | 1030±87                                   | 780±74*                                      | 1420±260                                  |
| <b><sup>57</sup>Fe</b> | 390±60**                                      | 700±50                                    | 920±100**                                    | 1680±260                                  |
| <b><sup>65</sup>Cu</b> | 200±19**                                      | 300±17                                    | 200±9*                                       | 330±78                                    |
| <sup>11</sup> B        | 150±37                                        | 180±16                                    | 200±140                                      | 200±46                                    |
| <sup>85</sup> Rb       | 71±7**                                        | 110±8                                     | 190±14                                       | 220±41                                    |
| <sup>7</sup> Li        | 39±3*                                         | 27±5                                      | 140±13**                                     | 300±25                                    |
| <sup>114</sup> Cd      | 28±3**                                        | 18±2                                      | 6±0.4                                        | 6±1                                       |
| <sup>60</sup> Ni       | 27±3                                          | 29±1                                      | 45±4                                         | 43±8                                      |
| <sup>98</sup> Mo       | 22±2**                                        | 30±2                                      | 36±2                                         | 46±7                                      |
| <sup>82</sup> Se       | 2±1                                           | 0.7±2                                     | 0±1                                          | 0±3                                       |
| <sup>59</sup> Co       | 1±0.1                                         | 2±0.3                                     | 4±0.3                                        | 7±1*                                      |
| <sup>75</sup> As       | 1±0.2                                         | 1±0.3                                     | 0.8±0.2                                      | 1±0.3                                     |

**Supporting Table 2:** Elemental content (pg) per seed for two generations of wild-type seed sieved into two classes: small (212-250 µm) and large (300-355 µm). Elements that are significantly different between large and small seeds from both generations are in bold. \*\* p<0.01, \* p<0.05. All elements that were significantly different were present in smaller amounts in the small seeds, except for Na.
